# Supplementary material for: Oral administration of the cannabigerol derivative VCE-003.2 promotes subventricular zone neurogenesis and protects against mutant huntingtin-induced neurodegeneration
Source: PubMed Central journal article supplement (PMC6407204; doi:10.1186/s40035-019-0148-x), 2019-03-08
Supplement: 40035_2019_148_MOESM1_ESM.pdf [file 40035_2019_148_MOESM1_ESM.pdf]

**Additional File 1. Microsomal Metabolic Stability.**

| <b>Metabolic Stability (Species = Human)</b> |                                             |                            |                              |
|----------------------------------------------|---------------------------------------------|----------------------------|------------------------------|
| <b>Compound</b>                              | <b>CL<sub>int</sub> (μL/min/mg protein)</b> | <b>SE CL<sub>int</sub></b> | <b>T<sub>1/2</sub> (min)</b> |
| <b>Dextrom Etorphan</b>                      | 23.9                                        | 2.21                       | 58.1                         |
| <b>Verapamil</b>                             | 171                                         | 2.13                       | 8.11                         |
| <b>VCE-003.2</b>                             | 131                                         | 8.09                       | 10.6                         |
| <b>CBG</b>                                   | 103                                         | 3.19                       | 13.4                         |
