# Supplementary material for: Oral administration of the cannabigerol derivative VCE-003.2 promotes subventricular zone neurogenesis and protects against mutant huntingtin-induced neurodegeneration
Source: PubMed Central journal article supplement (PMC6407204; doi:10.1186/s40035-019-0148-x), 2019-03-08
Supplement: 40035_2019_148_MOESM2_ESM.pdf [file 40035_2019_148_MOESM2_ESM.pdf]

**Additional File 2. Cytochrome P450 Inhibition (IC50 Determination).**

| <b>Cytochrome P450 Inhibition (Isoform)</b> | <b>IC50 (<math>\mu\text{M}</math>)</b> |
|---------------------------------------------|----------------------------------------|
| <b>CYP1A, Substrate = Etoxyresorufin</b>    | >25                                    |
| <b>CYP2B6, Substrate = Bupropion</b>        | >25                                    |
| <b>CYP2C8, Substrate = Paclitaxel</b>       | 13.0 $\pm$ 2.4                         |
| <b>CYP3A4, Substrate = Testosterone</b>     | >25                                    |
| <b>CYP2C19, Substrate = Mephenytoin</b>     | >25                                    |
| <b>CYP2D6, Substrate = Dextromethorphan</b> | >25                                    |
| <b>CYP3A4, Substrate = Midazolam</b>        | >25                                    |
| <b>CYP2C9, Substrate = Tolbutamide</b>      | 15.7 $\pm$ 1.96                        |
