# Supplementary material for: Oral administration of the cannabigerol derivative VCE-003.2 promotes subventricular zone neurogenesis and protects against mutant huntingtin-induced neurodegeneration
Source: PubMed Central journal article supplement (PMC6407204; doi:10.1186/s40035-019-0148-x), 2019-03-08
Supplement: 40035_2019_148_MOESM3_ESM.pdf [file 40035_2019_148_MOESM3_ESM.pdf]

**Additional File 3. hERG Channel Inhibition (IC<sub>50</sub> Determination).**

| <b>hERG Channel Inhibition</b> |                             |
|--------------------------------|-----------------------------|
| <b>Compound</b>                | <b>IC<sub>50</sub> (μM)</b> |
| <b>VCE-003.2</b>               | >25                         |
| <b>Quinidine</b>               | 1,76 ± 0.382                |
