# Supplementary material for: Oral administration of the cannabigerol derivative VCE-003.2 promotes subventricular zone neurogenesis and protects against mutant huntingtin-induced neurodegeneration
Source: PubMed Central journal article supplement (PMC6407204; doi:10.1186/s40035-019-0148-x), 2019-03-08
Supplement: 40035_2019_148_MOESM4_ESM.pdf [file 40035_2019_148_MOESM4_ESM.pdf]

**Additional File 4. AMES Data Summary.**

| <b>Compound</b>                                   | <b>Test Strain</b> | <b>S9</b> | <b>AMES Result</b> | <b>Highest Conc. Tested*</b> | <b>Comment</b>   |
|---------------------------------------------------|--------------------|-----------|--------------------|------------------------------|------------------|
| <b>2-nitrofluorine + 4-nitroquinoline N-oxide</b> | TA98               | no        | Positive           | 4 µg/ml + 2 µg/ml            | positive control |
| <b>2-nitrofluorine + 4-nitroquinoline N-oxide</b> | TA100              | no        | Positive           | 4 µg/ml + 2 µg/ml            | positive control |
| <b>aminoanthracene</b>                            | TA98               | yes       | Positive           | 5 µg/ml                      | positive control |
| <b>aminoanthracene</b>                            | TA100              | yes       | Positive           | 5 µg/ml                      | positive control |
| <b>VCE-003.2</b>                                  | TA98               | no        | Negative           | 250µg/mL                     |                  |
|                                                   | TA100              | no        | Negative           | 250µg/mL                     |                  |
|                                                   | TA98               | yes       | Negative           | 250µg/mL                     |                  |
|                                                   | TA100              | yes       | Negative           | 250µg/mL                     |                  |

\*Highest soluble concentration of test article in Ames assay conditions.
