# Supplementary material for: Oral administration of the cannabigerol derivative VCE-003.2 promotes subventricular zone neurogenesis and protects against mutant huntingtin-induced neurodegeneration
Source: PubMed Central journal article supplement (PMC6407204; doi:10.1186/s40035-019-0148-x), 2019-03-08

**Additional file 5. Effect of oral VCE-003.2 on plasmatic biomarkers.**

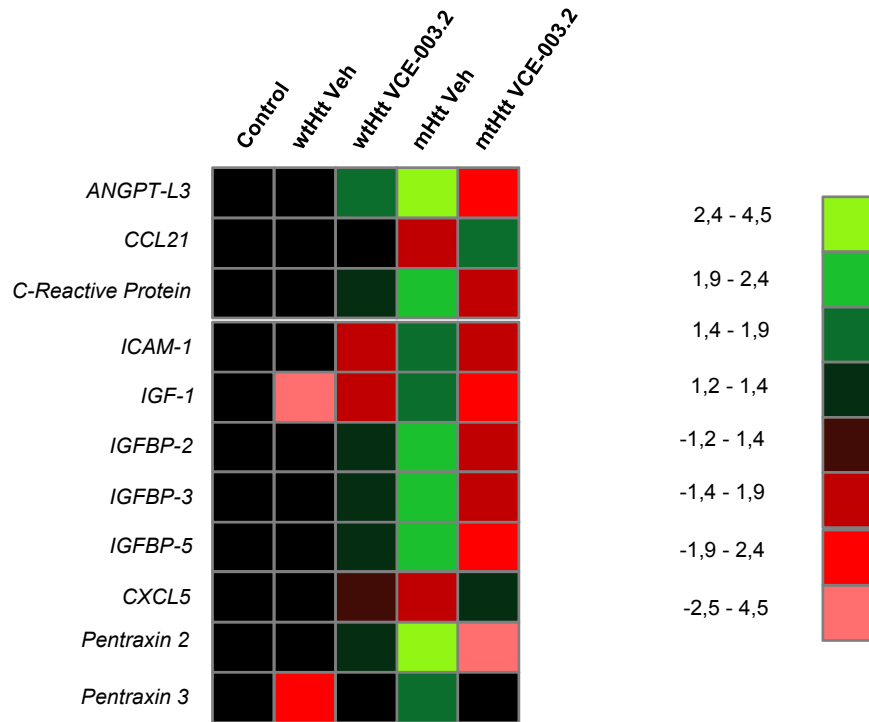

Supplement: 40035_2019_148_MOESM5_ESM.pdf [file 40035_2019_148_MOESM5_ESM.pdf]
