# Supplementary material for: Oral administration of the cannabigerol derivative VCE-003.2 promotes subventricular zone neurogenesis and protects against mutant huntingtin-induced neurodegeneration
Source: PubMed Central journal article supplement (PMC6407204; doi:10.1186/s40035-019-0148-x), 2019-03-08

**Additional File 6. 3-Nitropropionic acid model of striatal neurodegeneration.**

**a**

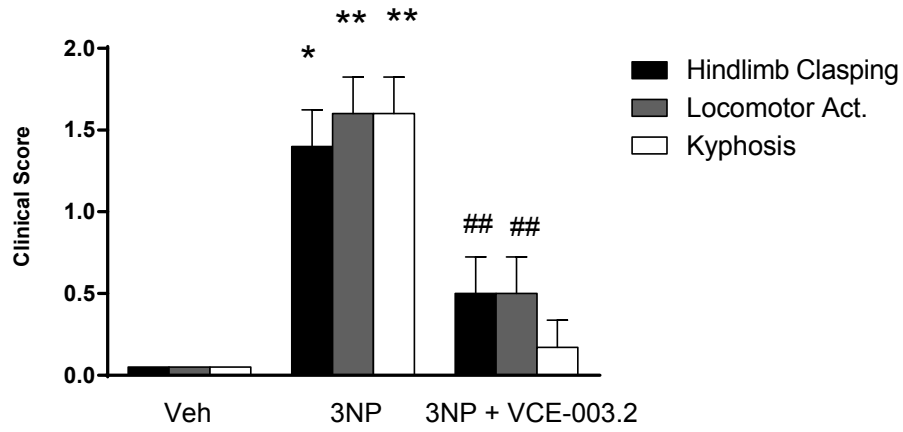

**b**

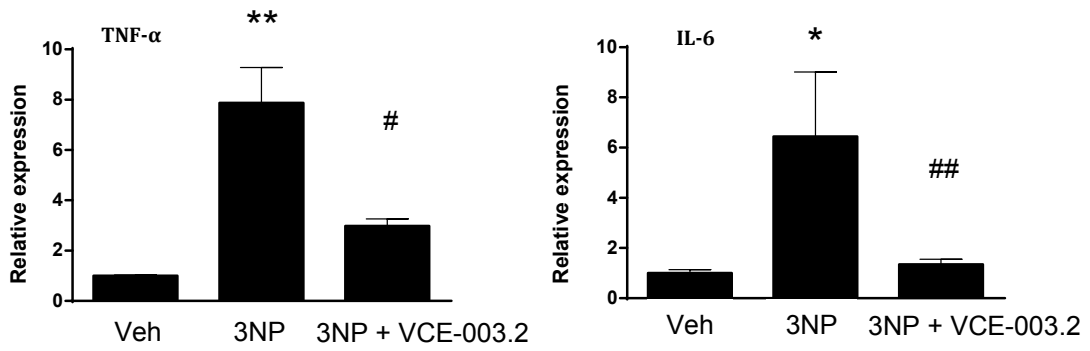

**c**

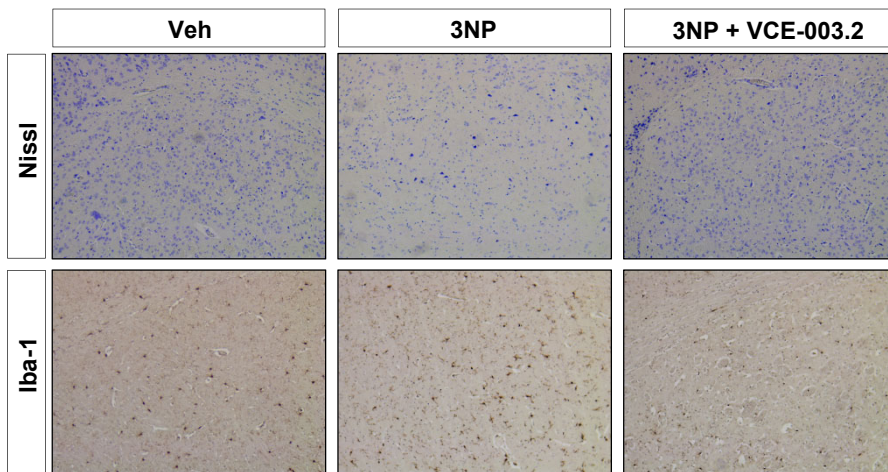

Supplement: 40035_2019_148_MOESM6_ESM.pdf [file 40035_2019_148_MOESM6_ESM.pdf]
